# Supplementary material for: Re-engineering multicloning sites for function and convenience
Source: PubMed Central journal article supplement — Nucleic Acids Res. 2011 May 17;39(14):e92. doi: 10.1093/nar/gkr346 (PMC3152365; doi:10.1093/nar/gkr346), 2011-05-17
Supplement: supp_gkr346_Supplementary_Information_4-21-11.pdf [file supp_gkr346_Supplementary_Information_4-21-11.pdf]

## **Supplementary Information**

- I. **Transcript Analysis for TEF-pBLUESCRIPT SK Series**
- II. **Initial Multicloning Site Design**
- III. **Supplemental Materials and Methods**
- IV. **Supplementary Figure 1:** yECitrine Transcript Levels vs yECitrine Fluorescence in the p416-TEF multicloning site series.
- V. **Supplementary Figure 2:** Performance of Designed Multicloning Sites TEF<sub>1</sub> and CYC1<sub>1</sub>
- VI. **Supplementary Figure 3:** Predicted Performance of Designed Multicloning Sites GPD<sub>2</sub>, TEF<sub>2</sub>, and CYC1<sub>2</sub>
- VII. **Supplementary Figure 4:** Effects of Designed MCSs on Expression Noise
- VIII. **Supplementary Table 1:** yECitrine Insert Series
- IX. **Supplementary Table 2:** pTEF<sub>1</sub>xYFP, pTEF<sub>2</sub>xYFP, pGPD<sub>2</sub>xYFP, pCYC1<sub>1</sub>xYFP, and pCYC1<sub>2</sub>xYFP.
- X. **Supplementary Table 3:** Oligos (IDT)
- XI. **Supplementary Table 4:** pTEF<sub>0</sub>xYFP, pGPD<sub>0</sub>xYFP and pCYC1<sub>0</sub>xYFP.
- XII. **Supplementary Table 5:** pTEF<sub>0</sub>xLacZ
- XIII. **Supplementary Table 6:** pTEF<sub>0</sub>xGFP
- XIV. **References**

### **I. Transcript Analysis for TEF-pBLUESCRIPT SK Series**

To determine whether decreased efficiency across the multicloning site was due to translation or transcription limitations, yECitrine transcript levels resulting from the series developed above were measured relative to Alg9, a known reference gene in yeast (1). The transcript levels of yECitrine were not found to significantly vary and thus do not correlate with measured fluorescence (**Supplementary Figure 1**). As a result, it was concluded that the observed restriction site-dependent performance was predominantly a translation-level effect. Therefore, transcriptional effects such as the presence/absence of transcription factor binding sites do not lead to the phenomenon seen in **Figure 1**.

## II. Initial Multicloning Site Design

Our initial hypothesis was that expression inhibition was due to the folding energy and structure of the entire 5'UTR. Therefore, promoter-specific MCSs were redesigned with the aim of increasing the ensemble folding energy of the 5'UTR (See Materials and Methods). Both reordering of enzyme sites and insertion of base-pairs to remove secondary structure were allowed. The resulting MCSs, dubbed TEF<sub>1</sub> and CYC1<sub>1</sub> for use after the TEF and CYC promoters, respectively, are shown in **Supplementary Table 2**. yECitrine was inserted at each restriction site as for the pBLUESCRIPT SK MCS, and the results are shown in **Supplementary Figure 2**. Despite the crudeness of this original model for MCS performance, both TEF<sub>1</sub> and CYC1<sub>1</sub> showed improved desirable performance.

The redesigned MCS TEF<sub>1</sub>, using the TEF promoter, is remarkable in that it maintains a narrow range of reporter expression between the 2<sup>nd</sup> and 9<sup>th</sup> restriction sites. In this region, the expression from pTEF<sub>1</sub>xYFP ranges between 0.69 and 0.42, whereas the expression from pBLUESCRIPT SK ranges between 1.03 and 0.26 in the same region. This property makes TEF<sub>1</sub> more appropriate for applications in which consistency in expression across varying sites within the MCS is desired.

The redesigned MCS CYC1<sub>1</sub>, using the CYC1 promoter, yields yECitrine expression equal to or greater than the pBLUESCRIPT SK for all but one of the available restriction sites, making this multicloning site desirable. Furthermore, the 2<sup>nd</sup>, 5<sup>th</sup>, and 6<sup>th</sup> sites attain the same level of expression as 1<sup>st</sup>, allowing more cloning possibilities without decreasing effective promoter strength. It is interesting to note that increases in expression can be attained by adding nucleotides to the 5'UTR (exemplified by pCYC1<sub>1</sub>5YFP and pCYC1<sub>1</sub>6YFP), illustrating that MCS inhibition is not simply due to length. This observation also required a different model for inhibition, as free energy of folding of the 5'UTR always decreases as more base pairs are added to the MCS. The assumption that the entire 5'UTR produces translation-inhibiting secondary structure was therefore incorrect, and so the model was reevaluated to create better multiple cloning sites for each of the three promoters.

### III. Supplemental Materials and Methods

#### ***Plasmid Construction: yECitrine Insert Series (Supplementary Table 1)***

Oligos 5-15 (**Supplementary Table 3**) were annealed by combining 750 pmol of each complementary oligo in 1X T4 DNA Ligase Buffer (NEB) and incubating at 95 °C for 150 sec. The mixture was then steadily cooled from 75 °C to 25 °C over 24 min. The annealed product was cleaned with a MERmaid Spin Kit (Qbiogene), digested with XbaI, and ligated to the phosphatased XbaI fragment of a p416 (2) vector expressing yECitrine with either a mutant TEF promoter (TEFpmut5 (3)), GPD, or CYC1. Vector and insert digestions were performed for 3 hours at 37 °C and cleaned with a QIAquick PCR Purification Kit (Qiagen) and MERmaid Spin Kit, respectively. Ligations were performed at room temperature for 30 min, followed by heat inactivation. Plasmids from distinct *E. coli* colonies were isolated, sequenced, and transformed into yeast.

#### ***RT-PCR Assay***

For each tested variant, the replicate yielding the most typical fluorescence measurement was grown to an optical density of 0.5 and its RNA was extracted (Ribopure Yeast Kit, Ambion). 100 ng RNA was reverse-transcribed and quantified in triplicate using an iScript One-Step RT-PCR Kit with SYBR Green (Biorad) immediately after RNA extraction. yECitrine transcript levels were measured relative to that of ALG9 (Primers 1-4) on a 7900HT Real Time PCR Instrument (Applied Biosystems).

#### IV. Supplementary Figure 1

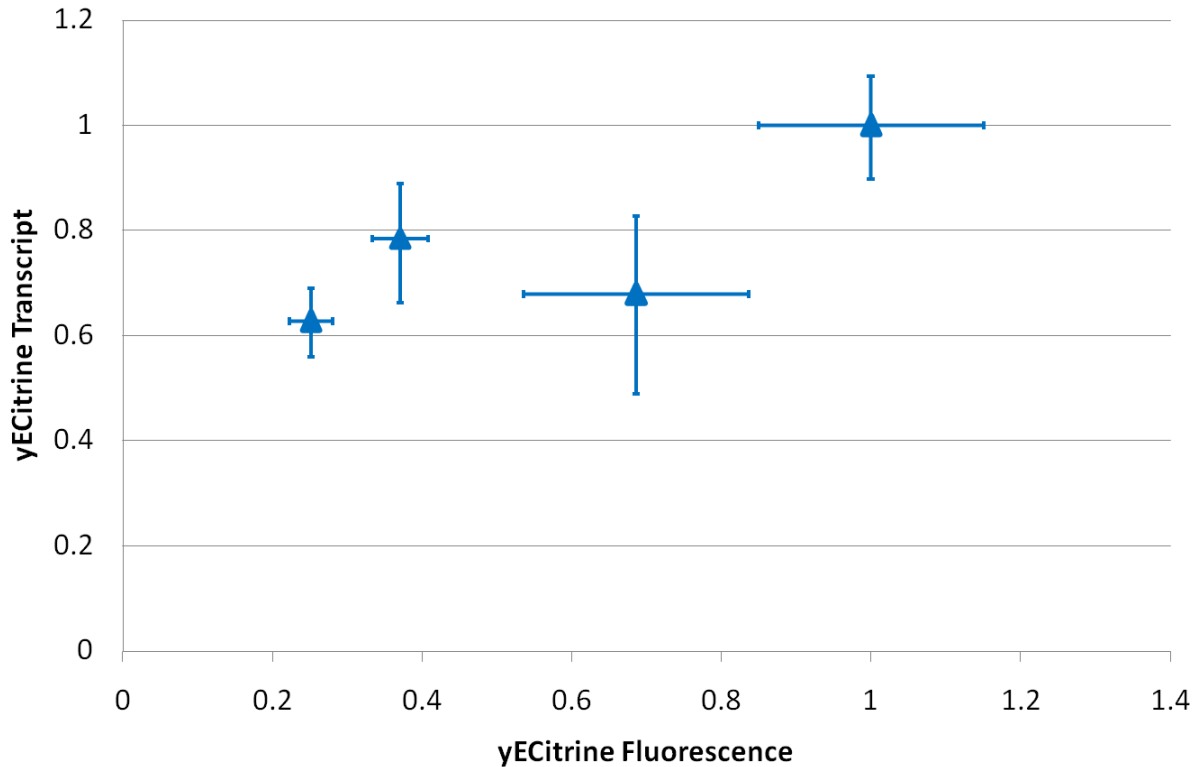

**Supplementary Figure 1:** *yECitrine Transcript Levels vs yECitrine Fluorescence in the p416-TEF multicloning site series.* *yECitrine* transcript levels were quantified in pTEF<sub>0</sub>1YFP, pTEF<sub>0</sub>4YFP, pTEF<sub>0</sub>7YFP, and pTEF<sub>0</sub>9YFP (**Supplementary Table 4**) and compared with fluorescence values obtained for that construct. Error bars in transcript level correspond to the standard deviation resulting from three measurements of the same RNA extract, and error bars in fluorescence level correspond to those shown in **Figure 1**. There is a non-correlation between transcript level and fluorescence level, thus suggesting translational inhibition.

### V. Supplementary Figure 2

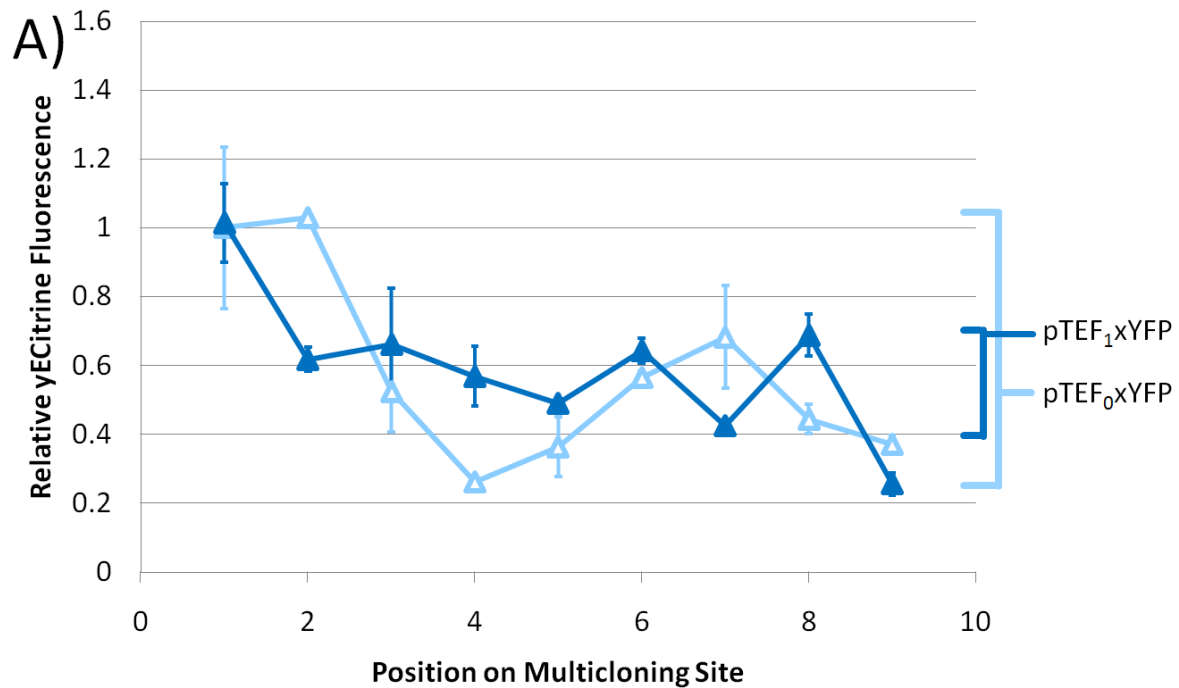

|                                                                                      |
|--------------------------------------------------------------------------------------|
| TCTAGA ACTAGT GGATCC CCCGGG CTGCAG GAATTC GATATC AAGCTT ATCGAT ACC GTCGAC CTCGAG     |
| XbaI 1 SpeI 2 BamHI 3 XmaI 4 PstI 5 EcoRI 6 EcoRV 7 HindIII 8 ClaI 9 Sall 10 XhoI 11 |

  

|                                                                                    |
|------------------------------------------------------------------------------------|
| ATCGAT AATAC GGATCC CC ACTAGT ACAAA GAATTC CCCC CTGCAG CCC CTCGAG CCC TCTAGA AAAAA |
| ClaI 1 BamHI 2 SpeI 3 EcoRI 4 PstI 5 XhoI 6 XbaI 7                                 |
| AAGCTT ACAAC GTCGAC ACAAA GATATC AAAAA CCCGGG                                      |
| HindIII 8 Sall 9 EcoRV 10 XmaI 11                                                  |

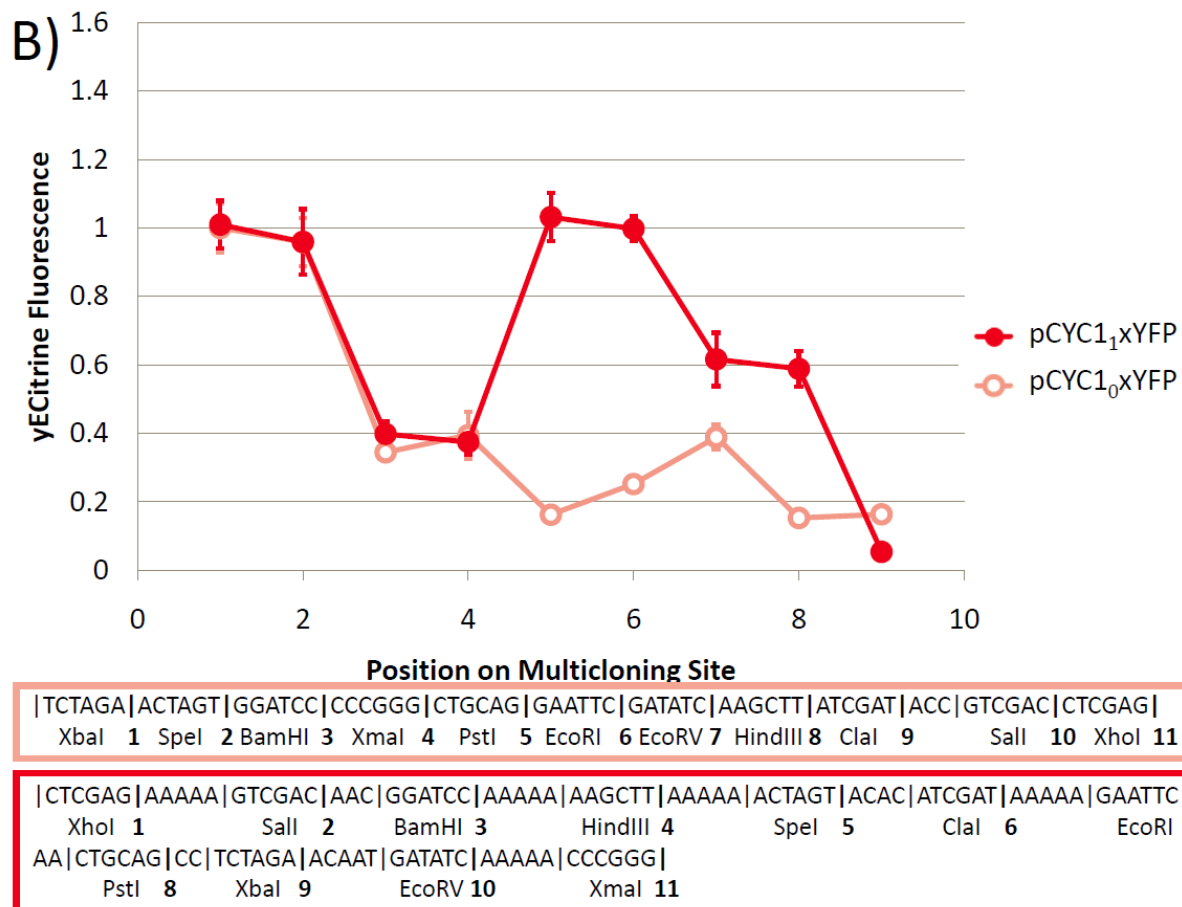

**Supplementary Figure 2:** Performance of designed multicloning sites (A) TEF<sub>1</sub> and (B) CYC<sub>1</sub>. Two MCSs were designed to minimize the ensemble free energy of the 5'UTR when placed after TEF or CYC1, respectively. Data in (A) has been scaled to the fluorescence of pTEF<sub>0</sub>1YFP and in (B) to pCYC1<sub>1</sub>YFP. Position on the MCS has been measured according to the unique restriction sites in the p416 vector. Error bars represent the standard deviation in fluorescence observed across biological triplicates.

VI. Supplementary Figure 3

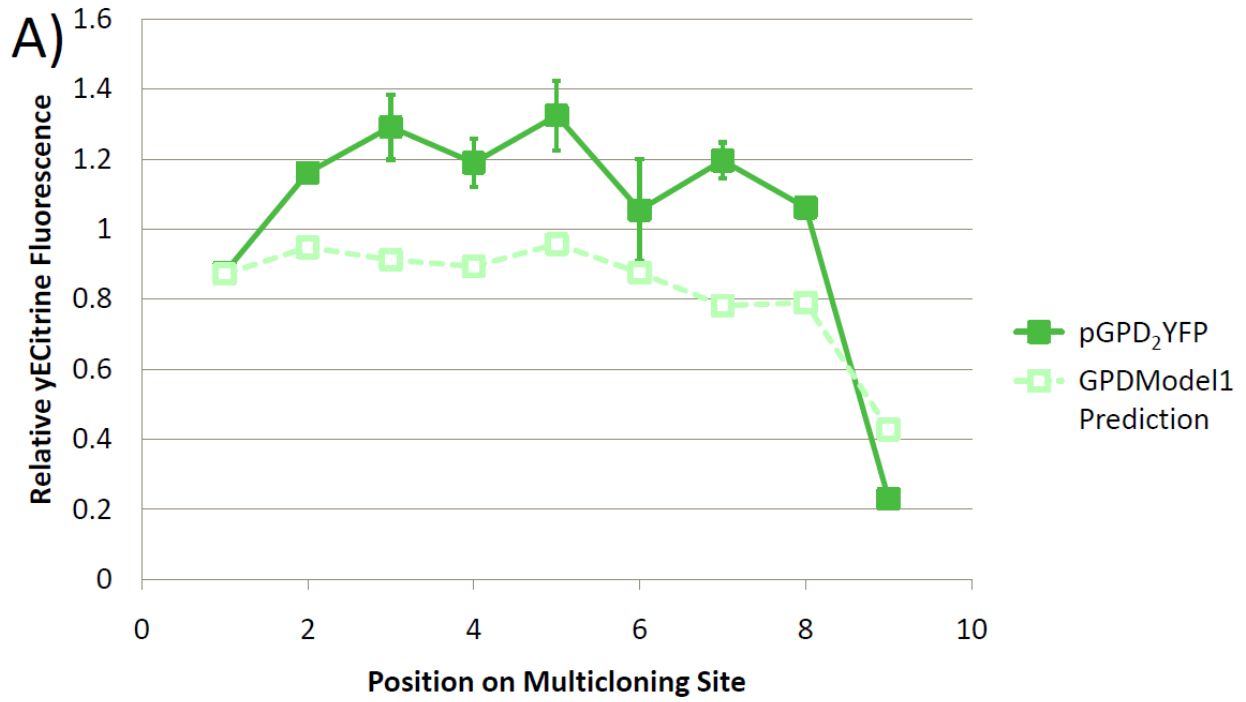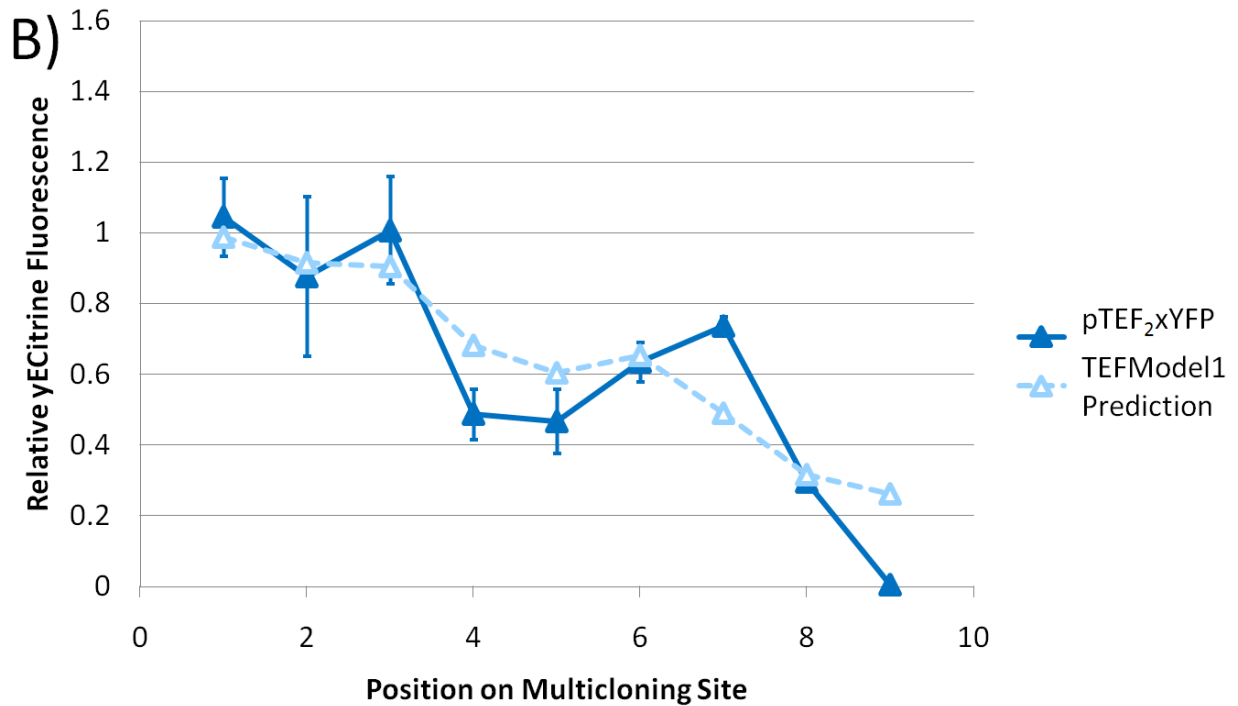



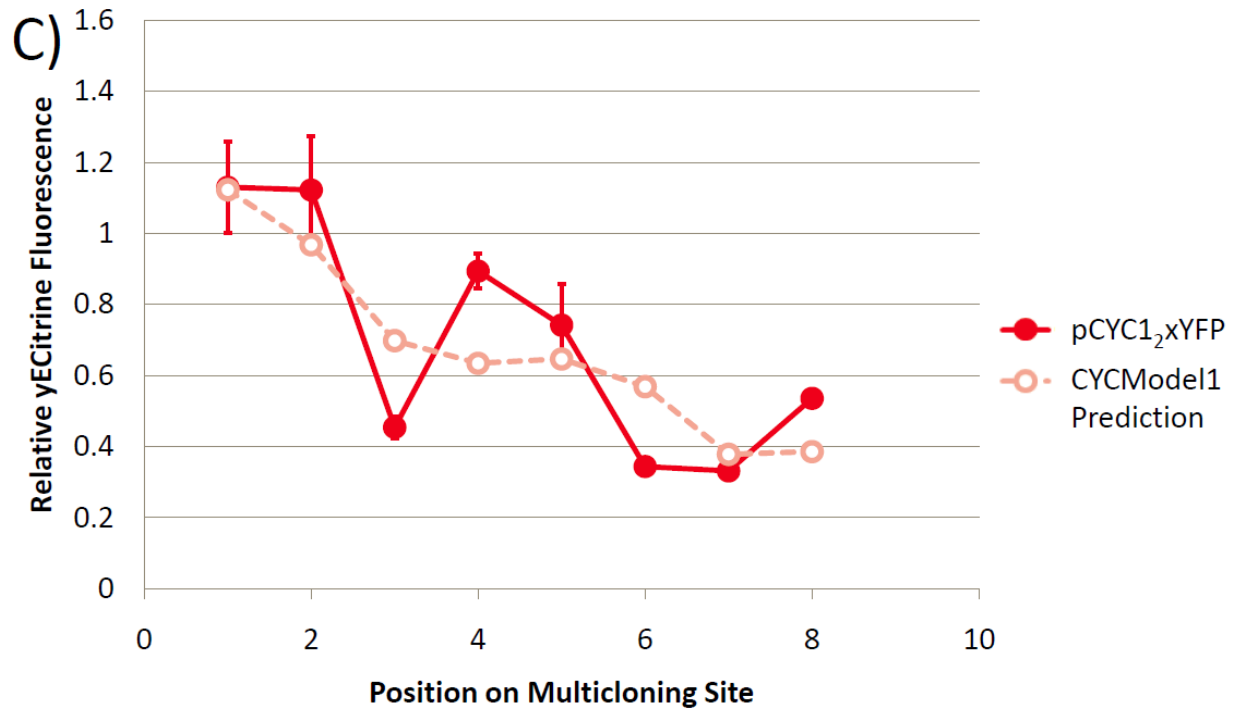

**Supplementary Figure 3:** *Predicted Performance of Designed Multicloning Sites (A) GPD<sub>2</sub>, (B) TEF<sub>2</sub>, and (C) CYC1<sub>2</sub>.* Prospective MCSs were designed according to the procedures described in Materials and Methods. Observed values for the expression levels allowed by each designed multicloning site are plotted as in **Figure 5**. Position on the MCS has been measured according to the unique restriction sites in the p416 vector. Error bars represent the standard deviation in fluorescence observed across three biological replicates. Designed multicloning sites show good agreement with model predictions.

VII. Supplementary Figure 4

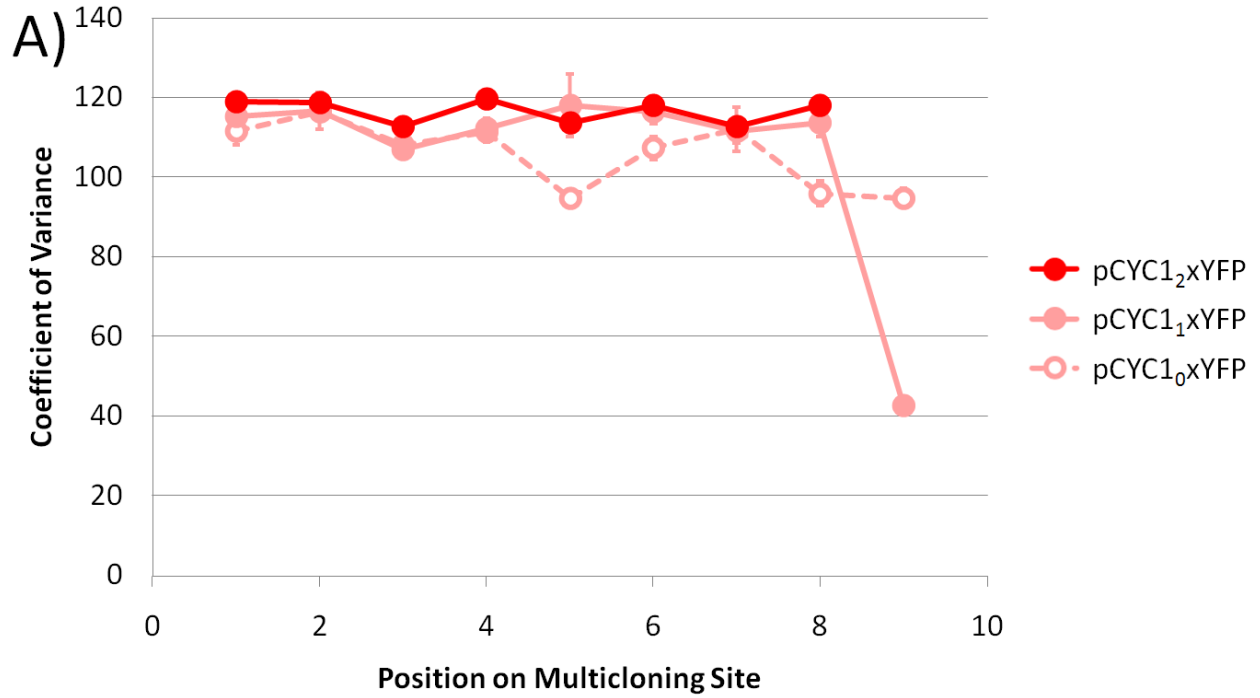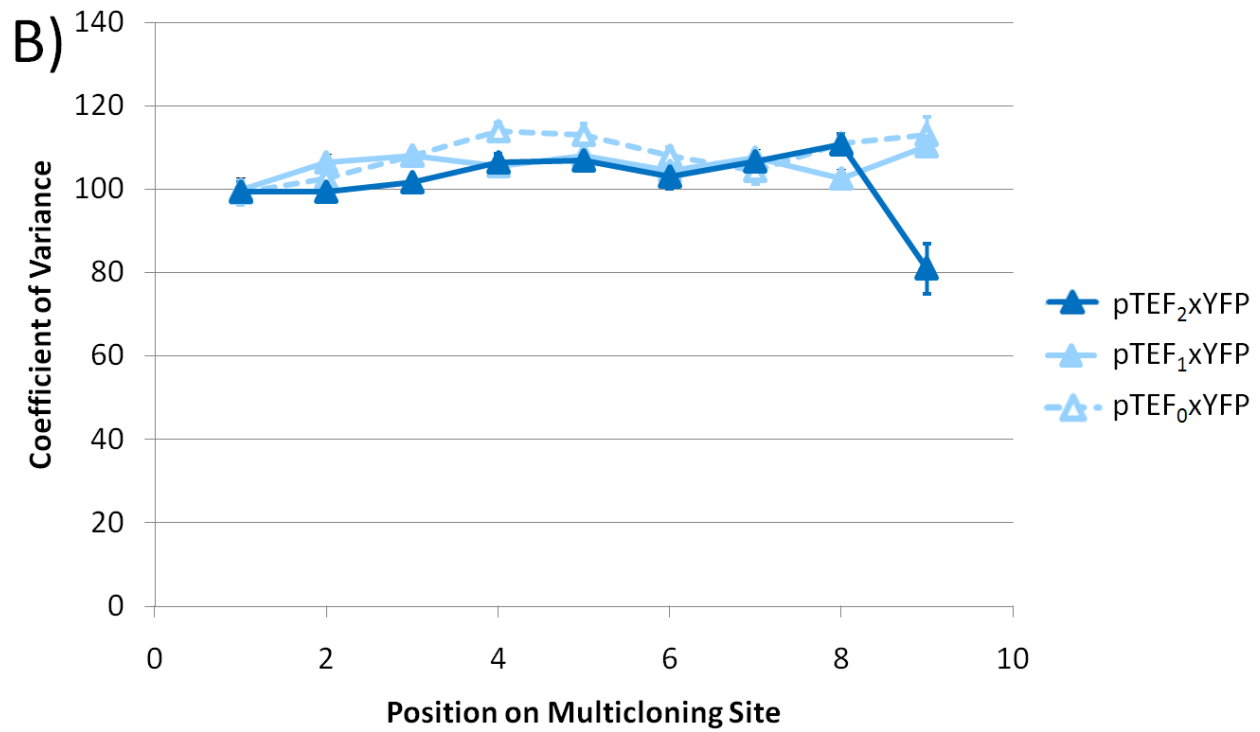

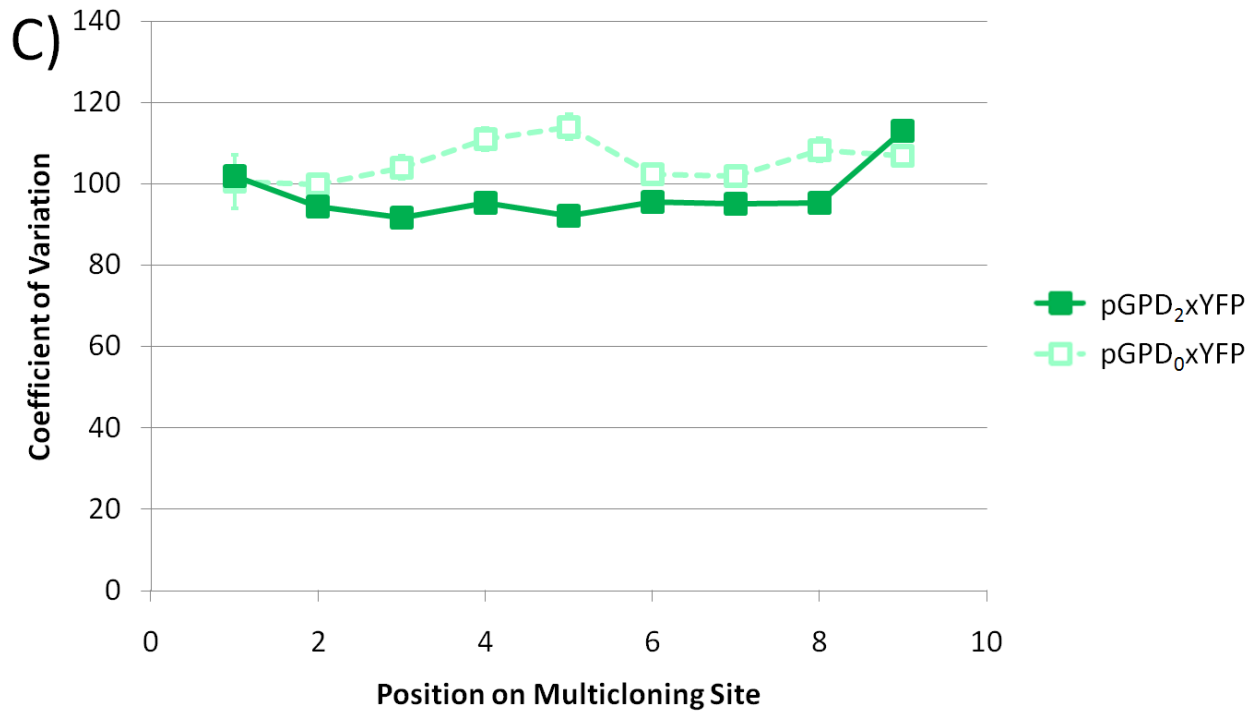

**Supplementary Figure 4:** *Effects of Designed MCSs on Expression Noise in (A) CYC1 MCSs, (B) TEF MCSs, and (C) GPD MCSs.* Expression noise is seen to be largely invariant with respect to restriction site and MCS. pCYC1<sub>1</sub>9YFP and pTEF<sub>2</sub>9YFP had fluorescence near the detection limits of our flow cytometer, leading to the decreased coefficients of variants seen in these constructs.

VIII. **Supplementary Table 1:** yECitrine Insert Series

|                  |                                                                                                                 |
|------------------|-----------------------------------------------------------------------------------------------------------------|
| pT5Y             | TEFpmut5-TCTAGA-AAA-YFP                                                                                         |
| pT21(1) F        | TEFpmut5-TCTAGA-GAATTC-TCTAGA-AAA-YFP                                                                           |
| pT21(1) FF       | TEFpmut5-TCTAGA-GAATTC-TCTAGA-GAATTC-TCTAGA-AAA-YFP                                                             |
| pT21(1) FFFF     | TEFpmut5-TCTAGA-GAATTC-TCTAGA-GAATTC-TCTAGA-GAATTC-TCTAGA-GAATTC-TCTAGA-AAA-YFP                                 |
| pT21(1) FFFFFFFF | TEFpmut5-TCTAGA-GAATTC-TCTAGA-GAATTC-TCTAGA-GAATTC-TCTAGA-GAATTC-TCTAGA-GAATTC-TCTAGA-GAATTC-TCTAGA-AAA-YFP     |
| pT21(2) F        | TEFpmut5-TCTAGA-GGTTGG-TCTAGA-AAA-YFP                                                                           |
| pT21(2) RR       | TEFpmut5-TCTAGA-CCAACC-TCTAGA-CCAACC-TCTAGA-AAA-YFP                                                             |
| pT21(2) RRR      | TEFpmut5-TCTAGA-CCAACC-TCTAGA-CCAACC-TCTAGA-CCAACC-TCTAGA-AAA-YFP                                               |
| pT21(3) F        | TEFpmut5-TCTAGA-GGGCCC-TCTAGA-AAA-YFP                                                                           |
| pT21(3) FF       | TEFpmut5-TCTAGA-GGGCCC-TCTAGA-GGGCCC-TCTAGA-AAA-YFP                                                             |
| pT21(4) F        | TEFpmut5-TCTAGA-AAATTT-TCTAGA-AAA-YFP                                                                           |
| pT21(4) FF       | TEFpmut5-TCTAGA-AAATTT-TCTAGA-AAATTT-TCTAGA-AAA-YFP                                                             |
| pT26 F           | TEFpmut5-TCTAGA-GA-GAATTC-AGG-TCTAGA-AAA-YFP                                                                    |
| pT26 RR          | TEFpmut5-TCTAGA-CCT-GAATTC-TC-TCTAGA-CCT-GAATTC-TC-TCTAGA-AAA-YFP                                               |
| pT36 F           | TEFpmut5-TCTAGA-AGTAGCC-GAATTC-TGTCAGTT-TCTAGA-AAA-YFP                                                          |
| pT46 F           | TEFpmut5-TCTAGA-AGGGACAACTT-GAATTC-ATTTAGGCGTAGT-TCTAGA-AAA-YFP                                                 |
| pGY              | GPD-TCTAGA-AAA-YFP                                                                                              |
| pG21(1) F        | GPD-TCTAGA-GAATTC-TCTAGA-AAA-YFP                                                                                |
| pG21(2) RR       | GPD-TCTAGA-CCAACC-TCTAGA-CCAACC-TCTAGA-AAA-YFP                                                                  |
| pG21(2) R        | GPD-TCTAGA-CCAACC-TCTAGA-AAA-YFP                                                                                |
| pG21(2) F        | GPD-TCTAGA-GGTTGG-TCTAGA-AAA-YFP                                                                                |
| pG21(3)          | GPD-TCTAGA-GGGCCC-TCTAGA-AAA-YFP                                                                                |
| pG21(4)          | GPD-TCTAGA-AAATTT-TCTAGA-AAA-YFP                                                                                |
| pG26 FRRR        | GPD-TCTAGA-GA-GAATTC-AGG-TCTAGA-CCT-GAATTC-TC-TCTAGA-CCT-GAATTC-TC-TCTAGA-CCT-GAATTC-TC-TCTAGA-AAA-YFP          |
| pG26 FRFF        | GPD-TCTAGA-GA-GAATTC-AGG-TCTAGA-CCT-GAATTC-TC-TCTAGA-GA-GAATTC-AGG-TCTAGA-GA-GAATTC-AGG-TCTAGA-AAA-YFP          |
| pG26 FFFR        | GPD-TCTAGA-GA-GAATTC-AGG-TCTAGA-GA-GAATTC-AGG-TCTAGA-GA-GAATTC-AGG-TCTAGA-CCT-GAATTC-TC-TCTAGA-AAA-YFP          |
| pG26 R           | GPD-TCTAGA-CCT-GAATTC-TC-TCTAGA-AAA-YFP                                                                         |
| pG36 FF          | GPD-TCTAGA-AGTAGCC-GAATTC-TGTCAGTT-TCTAGA-AGTAGCC-GAATTC-TGTCAGTT-TCTAGA-AAA-YFP                                |
| pG36 RRF -1      | GPD-TCTAGA-AACTGACA-GAATTC-GGCTACT-TCTAGA-AACTGACA-GAATTC-GGCTACT-TCTAGA-AGTACC-GAATTC-TGTCAGTT-TCTAGA-AAA-YFP  |
| pG36 RFF         | GPD-TCTAGA-AACTGACA-GAATTC-GGCTACT-TCTAGA-AGTAGCC-GAATTC-TGTCAGTT-TCTAGA-AGTAGCC-GAATTC-TGTCAGTT-TCTAGA-AAA-YFP |

|             |                                                                                                                                                 |
|-------------|-------------------------------------------------------------------------------------------------------------------------------------------------|
| pG46 RR     | GPD-TCTAGA-ACTACGCCTAAAT-GAATTC-AAGTTTGTCCCT-TCTAGA-ACTACGCCTAAAT-GAATTC-AAGTTTGTCCCT-TCTAGA-AAA-YFP                                            |
| pG46 R      | GPD-TCTAGA-ACTACGCCTAAAT-GAATTC-AAGTTTGTCCCT-TCTAGA-AAA-YFP                                                                                     |
| pG46 FF -1  | GPD-TCTAGA-AGGACAAACTT-GAATTC-ATTTAGGCGTAGT-TCTAGA-AGGGACAAACTT-GAATTC-ATTTAGGCGTAGT-TCTAGA-AAA-YFP                                             |
| pG46 F      | GPD-TCTAGA-AGGGACAAACTT-GAATTC-ATTTAGGCGTAGT-TCTAGA-AAA-YFP                                                                                     |
| pCY         | CYC1-TCTAGA-AAA-YFP                                                                                                                             |
| pC21(1) F   | CYC1-TCTAGA-GAATTC-TCTAGA-AAA-YFP                                                                                                               |
| pC21(2) R   | CYC1-TCTAGA-CCAACC-TCTAGA-AAA-YFP                                                                                                               |
| pC21(2) RF  | CYC1-TCTAGA-CCAACC-TCTAGA-GGTTGG-TCTAGA-AAA-YFP                                                                                                 |
| pC21(2) RFF | CYC1-TCTAGA-CCAACC-TCTAGA-GGTTGG-TCTAGA-GGTTGG-TCTAGA-AAA-YFP                                                                                   |
| pC21(2) FFF | CYC1-TCTAGA-GGTTGG-TCTAGA-GGTTGG-TCTAGA-GGTTGG-TCTAGA-AAA-YFP                                                                                   |
| pC21(3) F   | CYC1-TCTAGA-GGGCCC-TCTAGA-AAA-YFP                                                                                                               |
| pC21(3) FF  | CYC1-TCTAGA-GGGCCC-TCTAGA-GGGCCC-TCTAGA-GGGCCC-TCTAGA-AAA-YFP                                                                                   |
| pC21(4) F   | CYC1-TCTAGA-AAATTT-TCTAGA-AAA-YFP                                                                                                               |
| pC26 R      | CYC1-TCTAGA-CCT-GAATTC-TC-TCTAGA-AAA-YFP                                                                                                        |
| pC26 RFRF   | CYC1-TCTAGA-CCT-GAATTC-TC-TCTAGA-GA-GAATTC-AGG-TCTAGA-CCT-GAATTC-TC-TCTAGA-GA-GAATTC-AGG-TCTAGA-AAA-YFP                                         |
| pC26 RFRR   | CYC1-TCTAGA-CCT-GAATTC-TC-TCTAGA-GA-GAATTC-AGG-TCTAGA-CCT-GAATTC-TC-TCTAGA-CCT-GAATTC-TC-TCTAGA-AAA-YFP                                         |
| pC36 F      | CYC1-TCTAGA-AGTAGCC-GAATTC-TGTCAGTT-TCTAGA-AAA-YFP                                                                                              |
| pC36 RF     | CYC1-TCTAGA-AACTGACA-GAATTC-GGCTACT-TCTAGA-AGTAGCC-GAATTC-TGTCAGTT-TCTAGA-AAA-YFP                                                               |
| pC36 RRF    | CYC1-TCTAGA-AACTGACA-GAATTC-GGCTACT-TCTAGA-AACTGACA-GAATTC-GGCTACT-TCTAGA-AGTAGCC-GAATTC-TGTCAGTT-TCTAGA-AAA-YFP                                |
| pC36 RRRF   | CYC1-TCTAGA-AACTGACA-GAATTC-GGCTACT-TCTAGA-AACTGACA-GAATTC-GGCTACT-TCTAGA-AACTGACA-GAATTC-GGCTACT-TCTAGA-AGTAGCC-GAATTC-TGTCAGTT-TCTAGA-AAA-YFP |
| pC46 F      | CYC1-TCTAGA-AGGGACAAACTT-GAATTC-ATTTAGGCGTAGT-TCTAGA-AAA-YFP                                                                                    |
| pC46 RR     | CYC1-TCTAGA-ACTACGCCTAAAT-GAATTC-AAGTTTGTCCCT-TCTAGA-ACTACGCCTAAAT-GAATTC-AAGTTTGTCCCT-TCTAGA-AAA-YFP                                           |

IX. **Supplementary Table 2:** pTEF<sub>1</sub>xYFP, pTEF<sub>2</sub>xYFP, pGPD<sub>2</sub>xYFP, pCYC1<sub>1</sub>xYFP, and pCYC1<sub>2</sub>xYFP.

|                        |                                                                                                                                          |
|------------------------|------------------------------------------------------------------------------------------------------------------------------------------|
| pTEF <sub>1</sub> 1YFP | TEF-ATCGAT-YFP                                                                                                                           |
| pTEF <sub>1</sub> 2YFP | TEF-ATCGAT-AATAC-GGATCC-YFP                                                                                                              |
| pTEF <sub>1</sub> 3YFP | TEF-ATCGAT-AATAC-GGATCC-CC-ACTAGT-YFP                                                                                                    |
| pTEF <sub>1</sub> 4YFP | TEF-ATCGAT-AATAC-GGATCC-CC-ACTAGT-ACAAA-GAATTC-YFP                                                                                       |
| pTEF <sub>1</sub> 5YFP | TEF-ATCGAT-AATAC-GGATCC-CC-ACTAGT-ACAAA-GAATTC-CCCC-CTGCAG-CCC-CTCGAG-YFP                                                                |
| pTEF <sub>1</sub> 6YFP | TEF-ATCGAT-AATAC-GGATCC-CC-ACTAGT-ACAAA-GAATTC-CCCC-CTGCAG-CCC-CTCGAG-CCC-TCTAGA-YFP                                                     |
| pTEF <sub>1</sub> 7YFP | TEF-ATCGAT-AATAC-GGATCC-CC-ACTAGT-ACAAA-GAATTC-CCCC-CTGCAG-CCC-CTCGAG-CCC-TCTAGA-AAAAA-AAGCTT-YFP                                        |
| pTEF <sub>1</sub> 8YFP | TEF-ATCGAT-AATAC-GGATCC-CC-ACTAGT-ACAAA-GAATTC-CCCC-CTGCAG-CCC-CTCGAG-CCC-TCTAGA-AAAAA-AAGCTT-ACAAC-GTCGAC-YFP                           |
| pTEF <sub>1</sub> 9YFP | TEF-ATCGAT-AATAC-GGATCC-CC-ACTAGT-ACAAA-GAATTC-CCCC-CTGCAG-CCC-CTCGAG-CCC-TCTAGA-AAAAA-AAGCTT-ACAAC-GTCGAC-ACAAA-GATATC-AAAAA-CCCGGG-YFP |
| pTEF <sub>2</sub> 1YFP | TEF-ACCCC-ATCGAT-YFP                                                                                                                     |
| pTEF <sub>2</sub> 2YFP | TEF-ACCCC-ATCGAT-CACCC-ACTAGT-YFP                                                                                                        |
| pTEF <sub>2</sub> 3YFP | TEF-ACCCC-ATCGAT-CACCC-ACTAGT-TCTAGA-YFP                                                                                                 |
| pTEF <sub>2</sub> 4YFP | TEF-ACCCC-ATCGAT-CACCC-ACTAGT-TCTAGA-CCCC-GAATTC-YFP                                                                                     |
| pTEF <sub>2</sub> 5YFP | TEF-ACCCC-ATCGAT-CACCC-ACTAGT-TCTAGA-CCCC-GAATTC-CCCC-AAGCTT-YFP                                                                         |
| pTEF <sub>2</sub> 6YFP | TEF-ACCCC-ATCGAT-CACCC-ACTAGT-TCTAGA-CCCC-GAATTC-CCCC-AAGCTT-TAAA-GTCGAC-YFP                                                             |
| pTEF <sub>2</sub> 7YFP | TEF-ACCCC-ATCGAT-CACCC-ACTAGT-TCTAGA-CCCC-GAATTC-CCCC-AAGCTT-TAAA-GTCGAC-CCCC-CTCGAG-YFP                                                 |
| pTEF <sub>2</sub> 8YFP | TEF-ACCCC-ATCGAT-CACCC-ACTAGT-TCTAGA-CCCC-GAATTC-CCCC-AAGCTT-TAAA-GTCGAC-CCCC-CTCGAG-ACCCC-GGATCC-YFP                                    |
| pTEF <sub>2</sub> 9YFP | TEF-ACCCC-ATCGAT-CACCC-ACTAGT-TCTAGA-CCCC-GAATTC-CCCC-AAGCTT-TAAA-GTCGAC-CCCC-CTCGAG-ACCCC-GGATCC-CCCGGG-YFP                             |
| pGPD <sub>2</sub> 1YFP | GPD-A-AAGCTT-YFP                                                                                                                         |
| pGPD <sub>2</sub> 2YFP | GPD-A-AAGCTT-ACTAGT-YFP                                                                                                                  |
| pGPD <sub>2</sub> 3YFP | GPD-A-AAGCTT-ACTAGT-ATCGAT-YFP                                                                                                           |
| pGPD <sub>2</sub> 4YFP | GPD-A-AAGCTT-ACTAGT-ATCGAT-AAA-GAATTC-YFP                                                                                                |
| pGPD <sub>2</sub> 5YFP | GPD-A-AAGCTT-ACTAGT-ATCGAT-AAA-GAATTC-TCTAGA-YFP                                                                                         |
| pGPD <sub>2</sub> 6YFP | GPD-A-AAGCTT-ACTAGT-ATCGAT-AAA-GAATTC-TCTAGA-GGATCC-YFP                                                                                  |
| pGPD <sub>2</sub> 7YFP | GPD-A-AAGCTT-ACTAGT-ATCGAT-AAA-GAATTC-TCTAGA-GGATCC-CTGCAG-CTCGAG-YFP                                                                    |
| pGPD <sub>2</sub> 8YFP | GPD-A-AAGCTT-ACTAGT-ATCGAT-AAA-GAATTC-TCTAGA-GGATCC-CTGCAG-CTCGAG-GTCGAC-YFP                                                             |
| pGPD <sub>2</sub> 9YFP | GPD-A-AAGCTT-ACTAGT-ATCGAT-AAA-GAATTC-TCTAGA-GGATCC-CTGCAG-CTCGAG-GTCGAC-CCCGGG-YFP                                                      |

|                         |                                                                                                                                            |
|-------------------------|--------------------------------------------------------------------------------------------------------------------------------------------|
| pCYC1 <sub>1</sub> YFP  | CYC1-CTCGAG-YFP                                                                                                                            |
| pCYC1 <sub>2</sub> YFP  | CYC1-CTCGAG-AAAAA-GTCGAC-YFP                                                                                                               |
| pCYC1 <sub>3</sub> YFP  | CYC1-CTCGAG-AAAAA-GTCGAC-AAC-GGATCC-YFP                                                                                                    |
| pCYC1 <sub>4</sub> YFP  | CYC1-CTCGAG-AAAAA-GTCGAC-AAC-GGATCC-AAAAA-AAGCTT-YFP                                                                                       |
| pCYC1 <sub>5</sub> YFP  | CYC1-CTCGAG-AAAAA-GTCGAC-AAC-GGATCC-AAAAA-AAGCTT-AAAAA-ACTAGT-YFP                                                                          |
| pCYC1 <sub>6</sub> YFP  | CYC1-CTCGAG-AAAAA-GTCGAC-AAC-GGATCC-AAAAA-AAGCTT-AAAAA-ACTAGT-ACAC-ATCGAT-YFP                                                              |
| pCYC1 <sub>7</sub> YFP  | CYC1-CTCGAG-AAAAA-GTCGAC-AAC-GGATCC-AAAAA-AAGCTT-AAAAA-ACTAGT-ACAC-ATCGAT-AAAAA-GAATTC-YFP                                                 |
| pCYC1 <sub>8</sub> YFP  | CYC1-CTCGAG-AAAAA-GTCGAC-AAC-GGATCC-AAAAA-AAGCTT-AAAAA-ACTAGT-ACAC-ATCGAT-AAAAA-GAATTC-CCAA-CTGCAG-CC-TCTAGA-YFP                           |
| pCYC1 <sub>9</sub> YFP  | CYC1-CTCGAG-AAAAA-GTCGAC-AAC-GGATCC-AAAAA-AAGCTT-AAAAA-ACTAGT-ACAC-ATCGAT-AAAAA-GAATTC-CCAA-CTGCAG-CC-TCTAGA-ACAAT-GATATC-AAAAA-CCCGGG-YFP |
| pCYC1 <sub>2</sub> 1YFP | CYC1-AACCC-GGATCC-YFP                                                                                                                      |
| pCYC1 <sub>2</sub> 2YFP | CYC1-AACCC-GGATCC-AAGCTT-YFP                                                                                                               |
| pCYC1 <sub>2</sub> 3YFP | CYC1-AACCC-GGATCC-AAGCTT-AAAAC-TCTAGA-YFP                                                                                                  |
| pCYC1 <sub>2</sub> 4YFP | CYC1-AACCC-GGATCC-AAGCTT-AAAAC-TCTAGA-AACCA-ACTAGT-YFP                                                                                     |
| pCYC1 <sub>2</sub> 5YFP | CYC1-AACCC-GGATCC-AAGCTT-AAAAC-TCTAGA-AACCA-ACTAGT-ACCCA-ATCGAT-YFP                                                                        |
| pCYC1 <sub>2</sub> 6YFP | CYC1-AACCC-GGATCC-AAGCTT-AAAAC-TCTAGA-AACCA-ACTAGT-ACCCA-ATCGAT-CCTAA-GAATTC-YFP                                                           |
| pCYC1 <sub>2</sub> 7YFP | CYC1-AACCC-GGATCC-AAGCTT-AAAAC-TCTAGA-AACCA-ACTAGT-ACCCA-ATCGAT-CCTAA-GAATTC-AAAA-CCCGGG-YFP                                               |
| pCYC1 <sub>2</sub> 8YFP | CYC1-AACCC-GGATCC-AAGCTT-AAAAC-TCTAGA-AACCA-ACTAGT-ACCCA-ATCGAT-CCTAA-GAATTC-AAAA-CCCGGG-AGAAG-CTGCAG-TAAAA-GTCGAC-YFP                     |

X. **Supplementary Table 3:** Oligos (IDT)

|    |              |                                                                     |
|----|--------------|---------------------------------------------------------------------|
| 1  | RT YFP Fwd   | TTCTGTCTCCGGTGAAGGTGAA                                              |
| 2  | RT YFP Rev   | TAAGGTTGGCCATGGAAGTGGCAA                                            |
| 3  | RT ALG9 Fwd  | ATCGTGAAATTGCAGGCAGCTTGG                                            |
| 4  | RT ALG9 Rev  | CATGGCAACGGCAGAAGGCAATAA                                            |
| 5  | 21(1)        | GC-TCTAGA-GAATTC-TCTAGA-GC                                          |
| 6  | 21(2)F       | GC-TCTAGA-GGTTGG-TCTAGA-GC                                          |
| 7  | 21(2)R       | GC-TCTAGA-CCAACC-TCTAGA-GC                                          |
| 8  | 21(3)        | GC-TCTAGA-GGGCCC-TCTAGA-GC                                          |
| 9  | 21(4)        | GC-TCTAGA-AAATTT-TCTAGA-GC                                          |
| 10 | 26F          | GC-TCTAGA-GA-GAATTC-AGG-TCTAGA-GC                                   |
| 11 | 26R          | GC-TCTAGA-CCT-GAATTC-TC-TCTAGA-GC                                   |
| 12 | 36F          | GC-TCTAGA-AGTAGCC-GAATTC-TGTCAGTT-TCTAGA-GC                         |
| 13 | 36R          | GC-TCTAGA-AACTGACA-GAATTC-GGCTACT-TCTAGA-GC                         |
| 14 | 46F          | GC-TCTAGA-AGGGACAAACTT-GAATTC-ATTTAGGCGTAGT-TCTAGA-GC               |
| 15 | 46R          | GC-TCTAGA-ACTACGCCTAAAT-GAATTC-AAGTTTGTCCCT-TCTAGA-GC               |
| 16 | YFPXbaIF     | GC-TCTAGA-ATGTCTAAAGGTGAAGAATTATTCAGTGG                             |
| 17 | YFPspeIF     | G-ACTAGT-ATGTCTAAAGGTGAAGAATTATTCAGTGG                              |
| 18 | YFPBamHIF    | CG-GGATCC-ATGTCTAAAGGTGAAGAATTATTCAGTGG                             |
| 19 | YFPXmaIF     | TCC-CCCGGG-ATGTCTAAAGGTGAAGAATTATTCAGTGG                            |
| 20 | YFPEcoRIF    | G-GAATTC-ATGTCTAAAGGTGAAGAATTATTCAGTGG                              |
| 21 | YFPClaIF     | CC-ATCGAT-ATGTCTAAAGGTGAAGAATTATTCAGTGG                             |
| 22 | YFPSalIF     | TAACGC-GTCGAC-ATGTCTAAAGGTGAAGAATTATTCAGTGG                         |
| 23 | YFPXhoIF     | CCCCG-CTCGAG-ATGTCTAAAGGTGAAGAATTATTCAGTGG                          |
| 24 | YFPHindIIIIF | CCCCC-AAGCTT-ATGTCTAAAGGTGAAGAATTATTCAGTGG                          |
| 25 | YFPXhoIR     | CCCCG-CTCGAG-TTATTTGTACAATTCATCCATACCATGGG                          |
| 26 | YFPSalIR     | TAACGC-GTCGAC-TTATTTGTACAATTCATCCATACCATGGG                         |
| 27 | YFP fwd      | ATGTCTAAAGGTGAAGAATTATTCAGTGGTGG                                    |
| 28 | 6&8constfwd  | TCTAGA-ACTAGT-GGATCC-CCCGGG-CTGCAG-GAATTC-GATATC-AAGCTT             |
| 29 | 6constrev    | AGTGAATAATTCTTCACCTTTAGACAT-AAGCTT-GATATC-GAATTC-CTGC               |
| 30 | 8constrev    | GAATAATTCTTCACCTTTAGACAT-GTCGAC-GGT-ATCGAT-AAGCTT-GATATC-GAATTC-CTG |
| 31 | TEFpF        | CCCCC-GAGCTC-ATAGCTTCAAAATGTTTCTAC                                  |
| 32 | TEFpR        | AAACTTAGATTAGATTCGTATGCTTTCTTTC                                     |
| 33 | GPDpF        | CCCCC-GAGCTC-AGTTTATCATTATCAATACTCGCCA                              |
| 34 | GPDpR        | ATCCGTCGAAACTAAGTTCTGG                                              |
| 35 | CYC1pF       | CCCCC-GAGCTC-ATTTGGCGAGCG                                           |
| 36 | CYC1pR       | TTAGTGTGTGTATTTGTGTTTGGC                                            |
| 37 | CYCtermF     | ATTAGTTATGTCACGCTTACATTCACG                                         |
| 38 | CYCtermR     | GG-GGTACC-GGCCGCAAAT                                                |
| 39 | TEFdesMCS1-1 | TTGT-ACTAGT-GG-GGATCC-GTATT-ATCGAT-                                 |



|    |              |                                                                         |
|----|--------------|-------------------------------------------------------------------------|
|    |              | AAACTTAGATTAGATTTCGTATGCTTTCTTTC                                        |
| 40 | TEFdesMCS1-2 | C-GGATCC-CC-ACTAGT-ACAAA-GAATTC-CCCC-CTGCAG-CCC-CTCGAG-CCC-TCTAGA-AAAAA |
| 41 | TEFdesMCS1-3 | CCCGGG-TTTTT-GATATC-TTTGT-GTCGAC-GTTGT-AAGCTT-TTTTT-TCTAGA-GGG-CTCGAG-G |
| 42 | TEFdesMCS1-4 | ACAAA-GATATC-AAAAA-CCCGGG-TCATGTAATTAGTTATGTCACGCTTACATTCA              |
| 43 | TEFdesMCS2-1 | GAAAGCATAGCAATCTAATCTAAGTTT-ATCGAT-GTCGAC-GGATCC-ACTAGT-GAATTC-TCT      |
| 44 | TEFdesMCS2-2 | CTGCAG-GATATC-CTCGAG-CCCGGG-AAGCTT-TCTAGA-GAATTC-ACTAGT-GGATCC-G        |
| 45 | TEFdesMCS2-3 | TGAATGTAAGCGTGACATAACTAAT-CTGCAG-GATATC-CTCGAG-C                        |
| 46 | GPDdesMCS2-1 | CCAGAACTTAGTTTCGACGGAT-A-AAGCTT-ACTAGT-ATCGAT-AAA-GAATTC-TCTAGA-GGAT    |
| 47 | GPDdesMCS2-2 | GATATC-CCCGGG-GTCGAC-CTCGAG-CTGCAG-GGATCC-TCTAGA-GAATTC-TTT-ATCGAT-ACT  |
| 48 | GPDdesMCS2-3 | CGAC-CCCGGG-GATATC-ATTAGTTATGTCACGCTTACATTCA                            |
| 49 | CYCdesMCS1-1 | AAGCTT-TTTTT-GGATCC-GTT-GTCGAC-TTTTT-CTCGAG-TTAGTGTGTGATTTGTGTTTGC      |
| 50 | CYCdesMCS1-2 | CAAC-GGATCC-AAAAA-AAGCTT-AAAAA-ACTAGT-ACAC-ATCGAT-AAAAA-GAATTC-CCAA-CTG |
| 51 | CYCdesMCS1-3 | CCCGGG-TTTTT-GATATC-ATTGT-TCTAGA-GG-CTGCAG-TTGG-GAATTC-TTTTT-ATCGAT-G   |
| 52 | CYCdesMCS1-4 | TGAATGTAAGCGTGACATAACTAAT-CCCGGG-TTTTT-GATATC-ATTGT                     |
| 53 | CYCdesMCS2-1 | GCAAACACAAATACACACTAA-AACCC-GGATCC-AAGCTT-AAAAC-TCTAGA-AACCA-ACTA       |
| 54 | CYCdesMCS2-2 | T-CCCGGG-TTTT-GAATTC-TTAGG-ATCGAT-TGGGT-ACTAGT-TGGTT-TCTAGA-GTTTT-AAGCT |
| 55 | CYCdesMCS2-3 | CTAA-GAATTC-AAAA-CCCGGG-AGAAG-CTGCAG-TAAAA-GTCGAC-TAAAC-CTCGAG-GATATC   |
| 56 | CYCdesMCS2-4 | TGAATGTAAGCGTGACATAACTAAT-GATATC-CTCGAG-GTTTA-GTCGA                     |
| 57 | YFPXmaIR     | TCC-CCCGGG-TTATTTGTACAATTCATCCATACCATGGG                                |
| 58 | CD1-1R       | AGTGAATAATTCTTCACCTTTAGACAT-CTCGAG-TTAGTGTGTGATTTGTGTTTGC               |
| 59 | LacZExtF     | GC-TCTAGAAA-ATGACCATGATTACGGATTCACTGG                                   |
| 60 | LacZExtR     | ACGCGTCGACGGTATCGAT-TTATTTTTGACACCAGACCAACTGG                           |
| 61 | LacZXbaIF    | GC-TCTAGA-ATGACCATGATTACGGATTCACTGG                                     |
| 62 | LacZXhoIR    | CCCCG-CTCGAG-TTATTTTTGACACCAGACCAACTGGT                                 |
| 63 | LacZF        | ATGACCATGATTACGGATTCACTG                                                |
| 64 | Mummsfwd     | GC-TCTAGA-ACTAGT-GGATCC-CCC                                             |
| 65 | TL3F         | TCTAGA-ACTAGT-GGATCC-ATGACCATGATTACGGATTAC                              |
| 66 | TL57F        | TCTAGA-ACTAGT-GGATCC-CCCGGG-CTGCAG-GAATTC                               |
| 67 | TL5R         | GTGAATCCGTAATCATGGTCAT-GAATTC-CTGCAG-CCCC                               |
| 68 | TL7R         | GTGAATCCGTAATCATGGTCAT-ATCGAT-AAGCTT-GATATC-GAATTC-CTGCAG-CCCC          |
| 69 | TL9R         | CTCGAG-GTCGAC-GGT-ATCGAT-AAGCTT-GATATC-GAATTC-CTGCAG-CCCC               |

|    |           |                                             |
|----|-----------|---------------------------------------------|
| 70 | TL9F      | GATACC-GTCGAC-CTCGAG-ATGACCATGATTACGGATTCAC |
| 71 | GFPXbaIF  | GC-TCTAGA-ATGCGTAAAGGAGAAGAAGACTTTT         |
| 72 | GFPBamHIF | CG-GGATCC-ATGCGTAAAGGAGAAGAAGACTTTT         |
| 73 | GFPEcoRIF | G-GAATTC-ATGCGTAAAGGAGAAGAAGACTTTT          |
| 74 | GFPClaIF  | CC-ATCGAT-ATGCGTAAAGGAGAAGAAGACTTTT         |
| 75 | GFPXhoIF  | CCCCG-CTCGAG-ATGCGTAAAGGAGAAGAAGACTTTT      |
| 76 | GFPXhoIR  | CCCCG-CTCGAG-TTAAACTGCTGCAGCGTAG            |

XI. **Supplementary Table 4:** pTEF<sub>0</sub>xYFP, pGPD<sub>0</sub>xYFP and pCYC1<sub>0</sub>xYFP.

|                         |                                                                                           |
|-------------------------|-------------------------------------------------------------------------------------------|
| pTEF <sub>0</sub> 1YFP  | TEF-TCTAGA-YFP                                                                            |
| pTEF <sub>0</sub> 2YFP  | TEF-TCTAGA-ACTAGT-YFP                                                                     |
| pTEF <sub>0</sub> 3YFP  | TEF-TCTAGA-ACTAGT-GGATCC-YFP                                                              |
| pTEF <sub>0</sub> 4YFP  | TEF-TCTAGA-ACTAGT-GGATCC-CCCGGG-YFP                                                       |
| pTEF <sub>0</sub> 5YFP  | TEF-TCTAGA-ACTAGT-GGATCC-CCCGGG-CTGCAG-GAATTC-YFP                                         |
| pTEF <sub>0</sub> 6YFP  | TEF-TCTAGA-ACTAGT-GGATCC-CCCGGG-CTGCAG-GAATTC-GATATC-AAGCTT-YFP                           |
| pTEF <sub>0</sub> 7YFP  | TEF-TCTAGA-ACTAGT-GGATCC-CCCGGG-CTGCAG-GAATTC-GATATC-AAGCTT-ATCGAT-YFP                    |
| pTEF <sub>0</sub> 8YFP  | TEF-TCTAGA-ACTAGT-GGATCC-CCCGGG-CTGCAG-GAATTC-GATATC-AAGCTT-ATCGAT-ACC-GTCGAC-YFP         |
| pTEF <sub>0</sub> 9YFP  | TEF-TCTAGA-ACTAGT-GGATCC-CCCGGG-CTGCAG-GAATTC-GATATC-AAGCTT-ATCGAT-ACC-GTCGAC-CTCGAG-YFP  |
| pGPD <sub>0</sub> 1YFP  | GPD-TCTAGA-YFP                                                                            |
| pGPD <sub>0</sub> 2YFP  | GPD-TCTAGA-ACTAGT-YFP                                                                     |
| pGPD <sub>0</sub> 3YFP  | GPD-TCTAGA-ACTAGT-GGATCC-YFP                                                              |
| pGPD <sub>0</sub> 4YFP  | GPD-TCTAGA-ACTAGT-GGATCC-CCCGGG-YFP                                                       |
| pGPD <sub>0</sub> 5YFP  | GPD-TCTAGA-ACTAGT-GGATCC-CCCGGG-CTGCAG-GAATTC-YFP                                         |
| pGPD <sub>0</sub> 6YFP  | GPD-TCTAGA-ACTAGT-GGATCC-CCCGGG-CTGCAG-GAATTC-GATATC-AAGCTT-YFP                           |
| pGPD <sub>0</sub> 7YFP  | GPD-TCTAGA-ACTAGT-GGATCC-CCCGGG-CTGCAG-GAATTC-GATATC-AAGCTT-ATCGAT-YFP                    |
| pGPD <sub>0</sub> 8YFP  | GPD-TCTAGA-ACTAGT-GGATCC-CCCGGG-CTGCAG-GAATTC-GATATC-AAGCTT-ATCGAT-ACC-GTCGAC-YFP         |
| pGPD <sub>0</sub> 9YFP  | GPD-TCTAGA-ACTAGT-GGATCC-CCCGGG-CTGCAG-GAATTC-GATATC-AAGCTT-ATCGAT-ACC-GTCGAC-CTCGAG-YFP  |
| pCYC1 <sub>0</sub> 1YFP | CYC1-TCTAGA-YFP                                                                           |
| pCYC1 <sub>0</sub> 2YFP | CYC1-TCTAGA-ACTAGT-YFP                                                                    |
| pCYC1 <sub>0</sub> 3YFP | CYC1-TCTAGA-ACTAGT-GGATCC-YFP                                                             |
| pCYC1 <sub>0</sub> 4YFP | CYC1-TCTAGA-ACTAGT-GGATCC-CCCGGG-YFP                                                      |
| pCYC1 <sub>0</sub> 5YFP | CYC1-TCTAGA-ACTAGT-GGATCC-CCCGGG-CTGCAG-GAATTC-YFP                                        |
| pCYC1 <sub>0</sub> 6YFP | CYC1-TCTAGA-ACTAGT-GGATCC-CCCGGG-CTGCAG-GAATTC-GATATC-AAGCTT-YFP                          |
| pCYC1 <sub>0</sub> 7YFP | CYC1-TCTAGA-ACTAGT-GGATCC-CCCGGG-CTGCAG-GAATTC-GATATC-AAGCTT-ATCGAT-YFP                   |
| pCYC1 <sub>0</sub> 8YFP | CYC1-TCTAGA-ACTAGT-GGATCC-CCCGGG-CTGCAG-GAATTC-GATATC-AAGCTT-ATCGAT-ACC-GTCGAC-YFP        |
| pCYC1 <sub>0</sub> 9YFP | CYC1-TCTAGA-ACTAGT-GGATCC-CCCGGG-CTGCAG-GAATTC-GATATC-AAGCTT-ATCGAT-ACC-GTCGAC-CTCGAG-YFP |

XII. **Supplementary Table 5: pTEF<sub>0</sub>xLacZ**

|                         |                                                                                            |
|-------------------------|--------------------------------------------------------------------------------------------|
| pTEF <sub>0</sub> 1LacZ | TEF-TCTAGA-LacZ                                                                            |
| pTEF <sub>0</sub> 3LacZ | TEF-TCTAGA-ACTAGT-GGATCC- LacZ                                                             |
| pTEF <sub>0</sub> 5LacZ | TEF-TCTAGA-ACTAGT-GGATCC-CCCGGG-CTGCAG-GAATTC- LacZ                                        |
| pTEF <sub>0</sub> 7LacZ | TEF-TCTAGA-ACTAGT-GGATCC-CCCGGG-CTGCAG-GAATTC-GATATC-AAGCTT-ATCGAT- LacZ                   |
| pTEF <sub>0</sub> 9LacZ | TEF-TCTAGA-ACTAGT-GGATCC-CCCGGG-CTGCAG-GAATTC-GATATC-AAGCTT-ATCGAT-ACC-GTCGAC-CTCGAG- LacZ |

XIII. **Supplementary Table 6:** pTEF<sub>0</sub>xGFP

|                        |                                                                                               |
|------------------------|-----------------------------------------------------------------------------------------------|
| pTEF <sub>0</sub> 1GFP | TEF-TCTAGA-GFP                                                                                |
| pTEF <sub>0</sub> 3GFP | TEF-TCTAGA-ACTAGT-GGATCC- GFP                                                                 |
| pTEF <sub>0</sub> 5GFP | TEF-TCTAGA-ACTAGT-GGATCC-CCCGGG-CTGCAG-GAATTC- GFP                                            |
| pTEF <sub>0</sub> 7GFP | TEF-TCTAGA-ACTAGT-GGATCC-CCCGGG-CTGCAG-GAATTC-<br>GATATC-AAGCTT-ATCGAT- GFP                   |
| pTEF <sub>0</sub> 9GFP | TEF-TCTAGA-ACTAGT-GGATCC-CCCGGG-CTGCAG-GAATTC-<br>GATATC-AAGCTT-ATCGAT-ACC-GTCGAC-CTCGAG- GFP |

#### XIV. References

1. Teste, M.A., Duquenne, M., Francois, J.M. and Parrou, J.L. (2009) Validation of reference genes for quantitative expression analysis by real-time RT-PCR in *Saccharomyces cerevisiae*. *BMC Mol. Biol.*, **10**.
2. Mumberg, D., Muller, R. and Funk, M. (1995) Yeast Vectors for the Controlled Expression of Heterologous Proteins in Different Genetic Backgrounds. *Gene*, **156**, 119-122.
3. Nevoigt, E., Kohnke, J., Fischer, C.R., Alper, H., Stahl, U. and Stephanopoulos, G. (2006) Engineering of promoter replacement cassettes for fine-tuning of gene expression in *Saccharomyces cerevisiae*. *Appl. Environ. Microbiol.*, **72**, 5266-5273.
